# Supplementary material for: Solvent-Dispersible Nanostructured MIMI: An Experimental and Computational Study
Source: MDPI journal article supplement (doi:10.3390/app13052982), 2023-02-25
Supplement: s1 [file s1]

# *Solvent-dispersible nanostructured MIMI: an experimental and computational study*

Angela Candreva 1,2,\*, Giuseppe Di Maio 1, Giovanna Palermo 2,3, Alexa Guglielmelli 2,3, Giuseppe Strangi 2,3,4 and Massimo La Deda 1,2,\*

1 Department of Chemistry and Chemical Technologies, University of Calabria, 87036 Rende, Italy

2 CNR-NANOTEC, Istituto di Nanotecnologia, 87036 Rende, Italy

3 Department of Physics, NLHT-Lab, University of Calabria, 87036 Rende, Italy

4 Department of Physics, Case Western Reserve University, 2076 Adelbert Rd., Cleveland, OH 44106, USA

\* Correspondence: angela.candreva@unical.it (A.C.); massimo.ladeda@unical.it (M.L.D.)

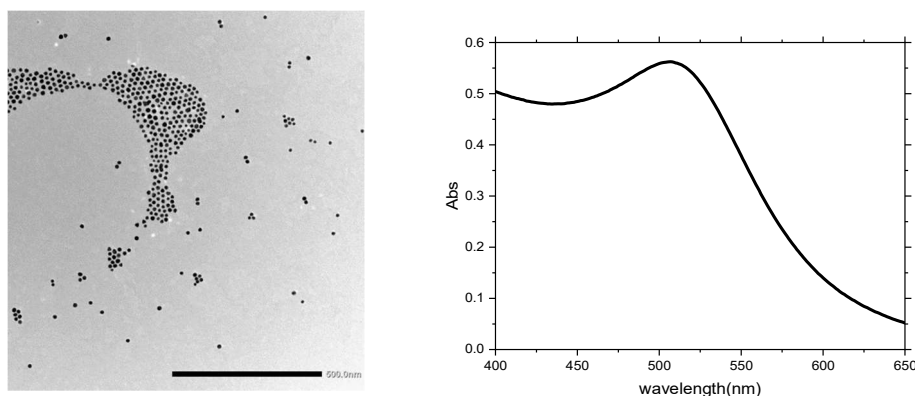

Figure S1. TEM images and Uv-vis spectra of AuNS@NaCit

## Cross-Section calculations

In electromagnetic scattering problems the total wave can be decomposed into incident ( $\mathbf{E}_{inc}$ ) and scattered waves ( $\mathbf{E}_{sc}$ ). From the scattered fields important physical quantities can be obtained as the cross section, which can be defined as the net rate at which electromagnetic energy ( $W$ ), crosses the surface of an imaginary sphere centered at the particle divided by the incident irradiation ( $\mathbf{P}_{inc}$ ) defined as:

$$\mathbf{P}_{inc} = \frac{1}{2\eta} |\mathbf{E}_{inc}|^2 \hat{\mathbf{k}} = \frac{1}{2} c\epsilon |\mathbf{E}_{inc}|^2 \hat{\mathbf{k}}$$

Where  $\eta$  is the characteristic impedance,  $\epsilon$  is the permittivity of the environment,  $c$  is the speed of light and  $\hat{\mathbf{k}}$  is the direction of the incident wave propagation.

The energy loss ( $Q_{loss}$ ) rate in a particle is:

$$Q_{loss} = \frac{1}{2} \text{Re}[\mathbf{J}_{tot} \cdot \mathbf{E}^* + j\omega \mathbf{B} \cdot \mathbf{H}^*]$$

Where  $\mathbf{J}_{tot}$  is a superposition of conduction and displacement currents.

The calculation of the cross sections, described in the main text, have been calculated for all the nano-objects (Figure S2).

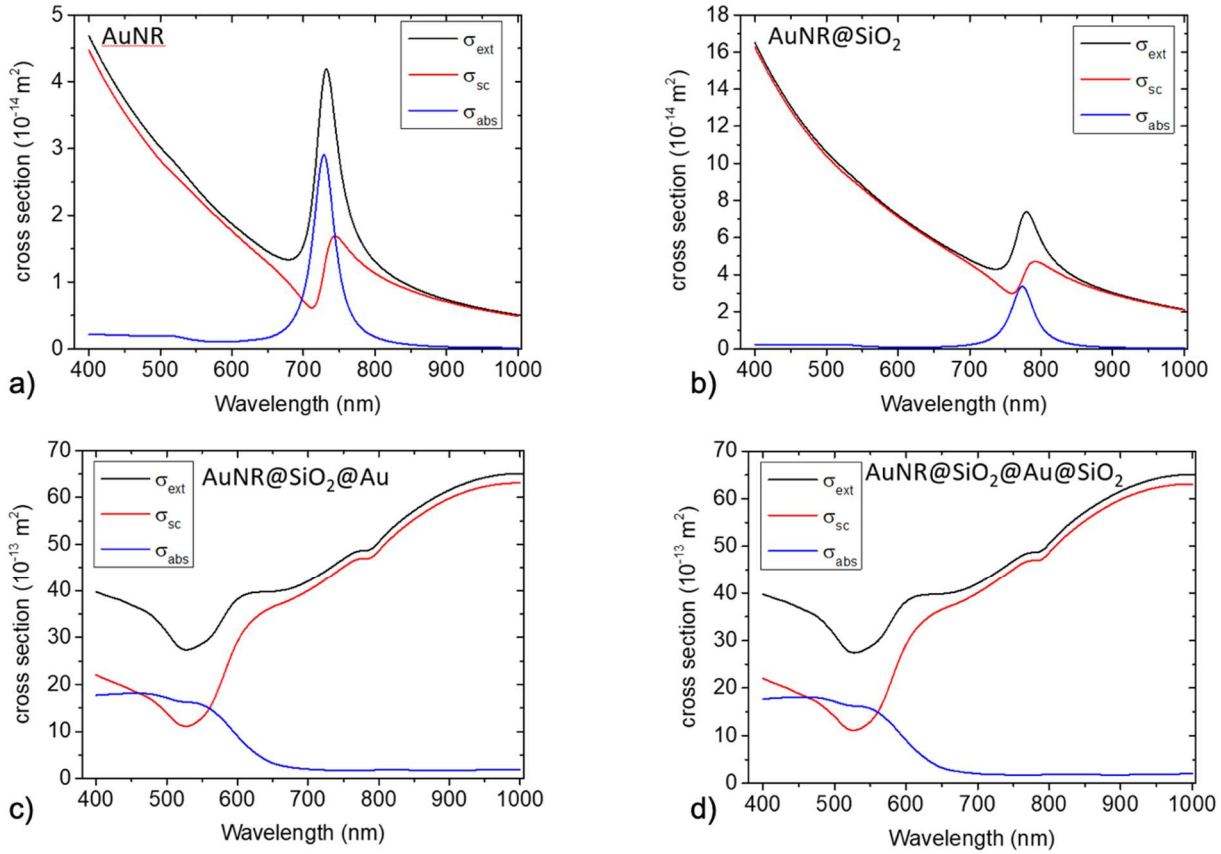

Figure S2. Calculated extinction, absorption and scattering cross sections of the (a) AuNR, (b) AuNR@SiO<sub>2</sub>, (c) AuNR@SiO<sub>2</sub>@Au and (d) AuNR@SiO<sub>2</sub>@Au@SiO<sub>2</sub>.

| Quantity    | Expression in Comsol | Value        | Description                         |
|-------------|----------------------|--------------|-------------------------------------|
| E0          | 3E5[V/m]             | 3E5 V/m      | Electromagnetic Field               |
| Radius      | 30[nm]               | 3E-8 m       | Radius of the sphere                |
| r_pml       | Radius*8             | 2.4E-7 m     | Radius of PML                       |
| t_pml       | Radius*3             | 9E-8m        | Thickness of PML                    |
| Lambda      | 515[nm]              | 5.15E-7 m    | Wavelength                          |
| Frequency   | C_const/Lambda       | 5.82E14 1/s  | Frequency                           |
| Lambda_min  | 400[nm]              | 4E-7m        | Minimum wavelength                  |
| Lambda_max  | 1000[nm]             | 1E-6m        | Maximum wavelength                  |
| Lambda_step | 5[nm]                | 5E-9m        | Wavelength step                     |
| Sigma_geom  | pi*(radius)^2        | 2.83E-15 m^2 | Geometric cross section             |
| S_in        | E0^2/(2*Z0_const)    | 1.19E8 W/m^2 | Scaling Factor                      |
| n_medium    | 1.333                | 1.333        | Refractive index surrounding medium |

Table S1. Parameters list used in the numerical modelling of the nanostructured.

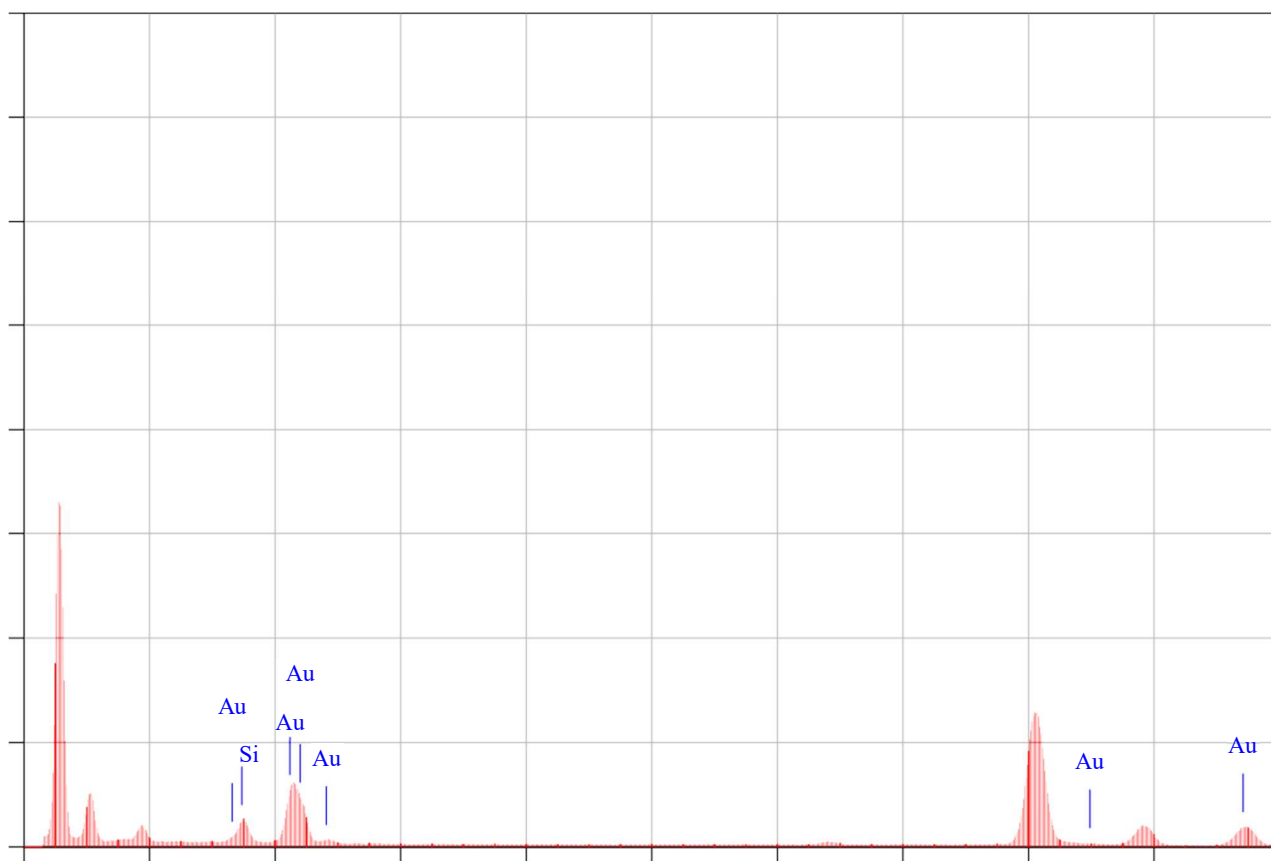

Figure S3. EDX measurement of AuNR@SiO<sub>2</sub>@Au@SiO<sub>2</sub>
