# Supplementary material for: Solvent-Dispersible Nanostructured MIMI: An Experimental and Computational Study
Source: MDPI journal article supplement (doi:10.3390/app13052982), 2023-02-25
Supplement: s1 [file s1]

Archive with 1 entries (1 files):
- applsci-2139428-supplementary.pdf
